# Supplementary material
Source: PubMed Central journal article supplement (PMC2492656)
Supplement: pp.108.123638_1.pdf [file pp.108.123638_1.pdf]

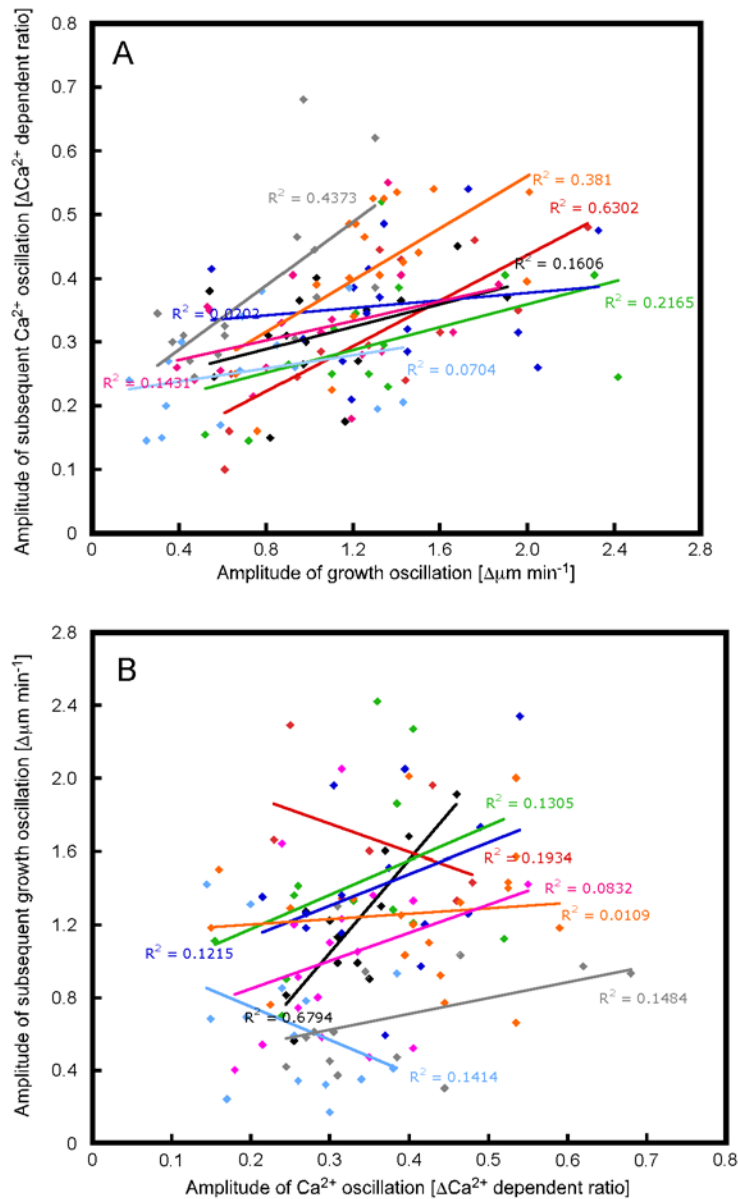

Supplementary Figure 1. Regression analysis of the relationship between peak  $\text{Ca}^{2+}$  levels during each oscillation and the preceding or following peak in growth rate. Peak  $\text{Ca}^{2+}$  level and preceding and following growth rate were plotted for 8 separate root hairs over 4-5 min of observation each equating to between 12 and 18 growth and  $\text{Ca}^{2+}$  peaks. Regression analysis was performed using Excel. Note that when plotting amplitudes of growth peaks versus subsequent  $\text{Ca}^{2+}$  peaks, the slopes of all trend lines are positive, whereas slopes are more variable for  $\text{Ca}^{2+}$  peaks versus subsequent growth peaks. However, in all cases, the regression coefficients are low, suggesting that either a poor relationship exists between these factors, or that the relationship between them is not a simple linear one. Alternatively, variability in the data likely related to making such measurements in  $\text{Ca}^{2+}$  levels and especially growth rate at the limits of resolution of current technology may also be obscuring the relationship.
