# Supplementary material
Source: PubMed Central journal article supplement (PMC2492656)
Supplement: pp.108.123638_2.pdf [file pp.108.123638_2.pdf]

Monshausen et al

Supplementary Figure 2

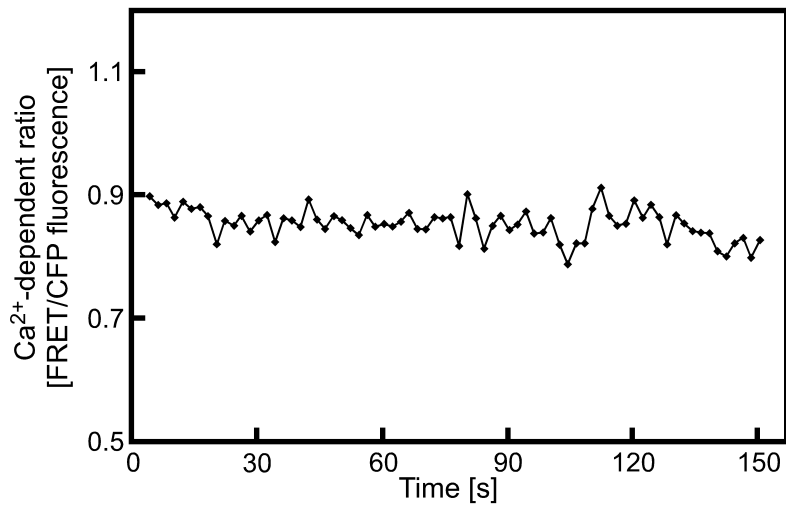

Supplementary Figure 2. Ca<sup>2+</sup> levels at the apex of a non-growing root hair. Root hairs that had ceased undergoing tip growth in Arabidopsis plants expressing the Ca<sup>2+</sup> sensor YC3.6 targeted to the cytosol were imaged every 3 s. Note the lack of detectable Ca<sup>2+</sup> oscillations at the apex.
