# Supplementary material
Source: PubMed Central journal article supplement (PMC2492656)
Supplement: pp.108.123638_3.pdf [file pp.108.123638_3.pdf]

Monshausen et al

supplementary Figure 3

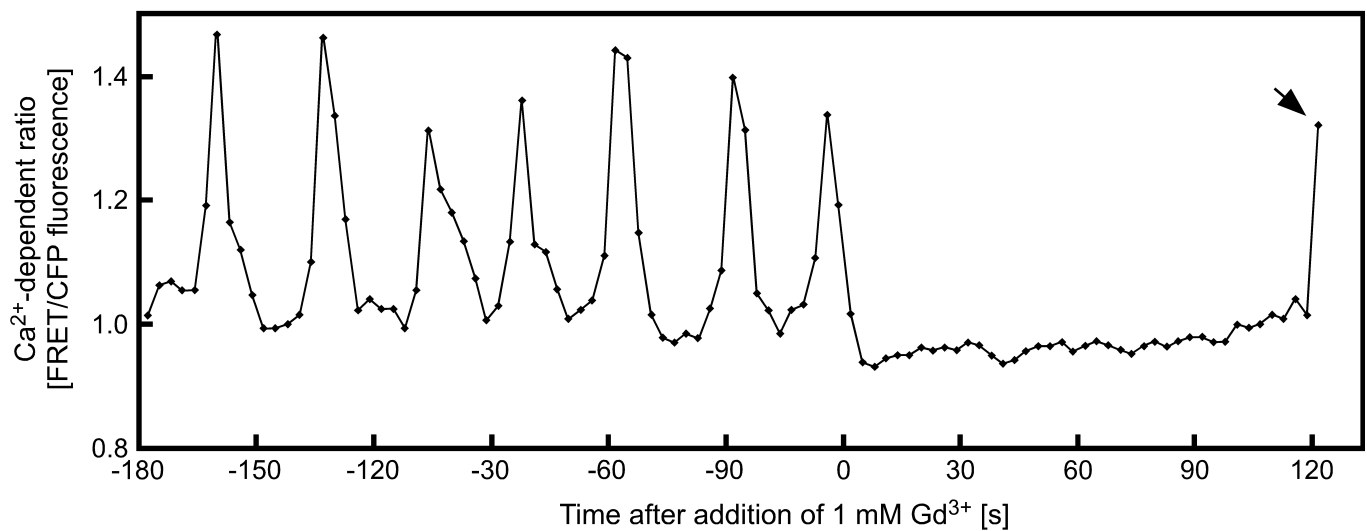

Supplementary Figure 3. Effect of Gd<sup>3+</sup> treatment on cytosolic Ca<sup>2+</sup>. Root hairs undergoing tip growth in Arabidopsis plants expressing the Ca<sup>2+</sup> sensor YC3.6 targeted to the cytosol were imaged every 3 s. 1 mM GdCl<sub>3</sub> was added and the effect on growth and Ca<sup>2+</sup> dynamics monitored. Note the reduction in tip Ca<sup>2+</sup> levels induced by addition of Gd<sup>3+</sup>. The sudden rapid increase in cytosolic Ca<sup>2+</sup> at the end of the recording (arrow) was caused by Ca<sup>2+</sup> entry as the cell ruptured. These effects mimic those seen upon La<sup>3+</sup> treatment. Numbers represent time in seconds. Scale bar=10 μm.
