# Supplementary material
Source: PubMed Central journal article supplement (PMC2492656)
Supplement: pp.108.123638_4.pdf [file pp.108.123638_4.pdf]

## Supplementary data

Supplementary movie 1. Cytosolic  $\text{Ca}^{2+}$  oscillations during tip growth of an *Arabidopsis* root hair. Cytosolic  $\text{Ca}^{2+}$  was monitored in plants expressing the soluble  $\text{Ca}^{2+}$  sensor YC3.6 as described in the Materials and Methods. Images were taken every 3 s. Movie duration 3.5 min.  $\text{Ca}^{2+}$  levels have been pseudocolor-coded according to the scale in Figure 1.

Supplementary Figure 1. Regression analysis of the relationship between peak  $\text{Ca}^{2+}$  levels during each oscillation and the preceding or following peak in growth rate. Peak  $\text{Ca}^{2+}$  level and preceding and following growth rate were plotted for 8 separate root hairs over 4-5 min of observation each equating to between 12 and 18 growth and  $\text{Ca}^{2+}$  peaks. Regression analysis was performed using Excel. Note that when plotting amplitudes of growth peaks versus subsequent  $\text{Ca}^{2+}$  peaks, the slopes of all trend lines are positive, whereas slopes are more variable for  $\text{Ca}^{2+}$  peaks versus subsequent growth peaks. However, in all cases, the regression coefficients are low, suggesting that either a poor relationship exists between these factors, or that the relationship between them is not a simple linear one. Alternatively, variability in the data likely related to making such measurements in  $\text{Ca}^{2+}$  levels and especially growth rate at the limits of resolution of current technology may also be obscuring the relationship.

Supplementary Figure 2.  $\text{Ca}^{2+}$  levels at the apex of a non-growing root hair. Root hairs that had ceased undergoing tip growth in *Arabidopsis* plants expressing the  $\text{Ca}^{2+}$  sensor YC3.6 targeted to the cytosol were imaged every 3 s. Note the lack of detectable  $\text{Ca}^{2+}$  oscillations at the apex.

Supplementary Figure 3. Effect of  $Gd^{3+}$  treatment on cytosolic  $Ca^{2+}$ . Root hairs undergoing tip growth in *Arabidopsis* plants expressing the  $Ca^{2+}$  sensor YC3.6 targeted to the cytosol were imaged every 3 s. 1 mM  $GdCl_3$  was added and the effect on growth and  $Ca^{2+}$  dynamics monitored. Note the reduction in tip  $Ca^{2+}$  levels induced by addition of  $Gd^{3+}$ . The sudden rapid increase in cytosolic  $Ca^{2+}$  at the end of the recording (arrow) was caused by  $Ca^{2+}$  entry as the cell ruptured. These effects mimic those seen upon  $La^{3+}$  treatment.
